# Supplementary material for: Evaluation of deep and shallow learning methods in chemogenomics for the prediction of drugs specificity
Source: PubMed Central journal article supplement (PMC7011501; doi:10.1186/s13321-020-0413-0), 2020-02-10
Supplement: 13321_2020_413_MOESM2_ESM.pdf [file 13321_2020_413_MOESM2_ESM.pdf]

Additional File 2

|                             | raw ( $S_1$ )       |                     |                     | orphan proteins ( $S_2$ ) |                     |                    | orphan molecules ( $S_3$ ) |                     |                     | double orphan ( $S_4$ ) |                     |                     |
|-----------------------------|---------------------|---------------------|---------------------|---------------------------|---------------------|--------------------|----------------------------|---------------------|---------------------|-------------------------|---------------------|---------------------|
|                             | 1:1                 | 1:2                 | 1:5                 | 1:1                       | 1:2                 | 1:5                | 1:1                        | 1:2                 | 1:5                 | 1:1                     | 1:2                 | 1:5                 |
| SVM                         | <b>75.14 ± 1.7</b>  | 74.95 ± 2.04        | 74.99 ± 1.76        | 54.97 ± 4.33              | 56.5 ± 4.29         | 56.67 ± 4.44       | 74.03 ± 3.8                | 73.89 ± 3.78        | 74.14 ± 3.72        | 53.84 ± 8.86            | 54.46 ± 8.43        | 53.06 ± 9.63        |
| <i>NRLMF</i>                | <b>78.8 ± 3.68</b>  | <b>78.88 ± 2.73</b> | <b>78.41 ± 2.69</b> | <b>65.05 ± 7.1</b>        | <b>64.96 ± 6.32</b> | <b>65.4 ± 4.9</b>  | <b>77.19 ± 1.65</b>        | <b>77.21 ± 1.81</b> | <b>77.38 ± 1.81</b> | <b>65.2 ± 7.26</b>      | <b>64.59 ± 6.26</b> | <b>63.61 ± 6.51</b> |
| FNN                         | <b>75.92 ± 1.17</b> | 74.63 ± 1.04        | 74.88 ± 1.52        | 58.25 ± 5.34              | 55.12 ± 4.67        | 54.88 ± 4.98       | 74.67 ± 2.38               | <b>75.52 ± 2.4</b>  | 73.96 ± 3.15        | 56.03 ± 9.22            | 55.91 ± 8.07        | 54.68 ± 8.12        |
| chemogenomic neuron network | <b>77.1 ± 1.83</b>  | <b>76.5 ± 0.89</b>  | <b>76.74 ± 0.85</b> | <b>61.9 ± 4.41</b>        | <b>59.64 ± 8.55</b> | <b>64.25 ± 4.0</b> | 73.49 ± 3.99               | 74.04 ± 4.91        | 74.91 ± 3.98        | <b>59.23 ± 9.5</b>      | <b>58.4 ± 8.74</b>  | <b>58.62 ± 9.1</b>  |

Table S1 : ROCAUC scores on the *DBEC* dataset in four settings, for a test sample positive:negative ratios in {1:1, 1:2, 1:5}

|                             | raw ( $S_1$ )       |                     |                     | orphan proteins ( $S_2$ ) |                     |                     | orphan molecules ( $S_3$ ) |                     |                     | double orphan ( $S_4$ ) |                    |                    |
|-----------------------------|---------------------|---------------------|---------------------|---------------------------|---------------------|---------------------|----------------------------|---------------------|---------------------|-------------------------|--------------------|--------------------|
|                             | 1:1                 | 1:2                 | 1:5                 | 1:1                       | 1:2                 | 1:5                 | 1:1                        | 1:2                 | 1:5                 | 1:1                     | 1:2                | 1:5                |
| SVM                         | <b>81.75 ± 1.75</b> | <b>73.25 ± 2.4</b>  | <b>61.55 ± 3.11</b> | 59.62 ± 5.55              | <b>45.89 ± 6.73</b> | <b>28.95 ± 7.66</b> | <b>80.79 ± 2.37</b>        | <b>72.02 ± 3.06</b> | <b>60.96 ± 3.73</b> | 58.52 ± 9.21            | 43.37 ± 9.15       | 24.4 ± 8.8         |
| <i>NRLMF</i>                | <b>82.56 ± 2.82</b> | <b>73.89 ± 2.98</b> | <b>59.89 ± 4.35</b> | <b>67.56 ± 7.04</b>       | <b>53.18 ± 8.12</b> | <b>35.62 ± 8.07</b> | <b>81.49 ± 1.48</b>        | <b>72.35 ± 2.2</b>  | <b>60.06 ± 2.73</b> | <b>67.93 ± 8.63</b>     | <b>52.97 ± 8.7</b> | <b>34.5 ± 9.75</b> |
| FNN                         | <b>79.82 ± 0.98</b> | 68.07 ± 2.35        | 51.55 ± 2.55        | 61.92 ± 5.11              | 42.24 ± 5.27        | 24.26 ± 3.91        | 78.57 ± 2.22               | 68.14 ± 3.43        | 49.34 ± 3.11        | <b>60.04 ± 8.83</b>     | 43.55 ± 9.84       | 22.97 ± 6.59       |
| chemogenomic neuron network | 79.04 ± 2.24        | 66.5 ± 2.51         | 49.08 ± 4.31        | <b>60.79 ± 6.24</b>       | <b>45.11 ± 8.65</b> | <b>28.38 ± 5.81</b> | 76.23 ± 2.23               | 64.61 ± 4.78        | 46.14 ± 4.92        | <b>61.97 ± 8.72</b>     | <b>45.81 ± 8.5</b> | <b>27.0 ± 6.96</b> |

Table S2 : AUPR scores on the *DBEC* dataset in four settings, for a test sample positive:negative ratios in {1:1, 1:2, 1:5}

|                             | raw ( $S_1$ )       |                     |                     | orphan proteins ( $S_2$ ) |                    |                    | orphan molecules ( $S_3$ ) |                     |                     | double orphan ( $S_4$ ) |                     |                     |
|-----------------------------|---------------------|---------------------|---------------------|---------------------------|--------------------|--------------------|----------------------------|---------------------|---------------------|-------------------------|---------------------|---------------------|
|                             | 1:1                 | 1:2                 | 1:5                 | 1:1                       | 1:2                | 1:5                | 1:1                        | 1:2                 | 1:5                 | 1:1                     | 1:2                 | 1:5                 |
| SVM                         | 74.6 ± 0.57         | 74.6 ± 0.55         | 74.62 ± 0.54        | 50.26 ± 3.05              | 49.88 ± 3.06       | 49.88 ± 2.95       | 75.16 ± 1.51               | 75.28 ± 1.76        | 75.14 ± 1.69        | 49.79 ± 1.61            | 50.25 ± 1.84        | 50.5 ± 1.68         |
| <i>NRLMF</i>                | 82.98 ± 0.55        | 83.06 ± 0.65        | 83.12 ± 0.63        | 65.18 ± 1.36              | 65.18 ± 1.28       | 65.23 ± 1.2        | 59.49 ± 0.96               | 59.56 ± 0.81        | 59.6 ± 0.93         | 50.37 ± 1.48            | 50.29 ± 1.55        | 50.47 ± 1.35        |
| FNN                         | <b>90.39 ± 0.42</b> | <b>90.65 ± 0.46</b> | <b>90.45 ± 0.52</b> | 74.74 ± 0.54              | 74.08 ± 2.29       | 74.25 ± 1.96       | 83.06 ± 1.48               | <b>83.52 ± 1.52</b> | 82.9 ± 1.8          | <b>69.12 ± 2.3</b>      | <b>69.17 ± 1.99</b> | 68.79 ± 1.69        |
| chemogenomic neuron network | 88.67 ± 1.59        | 88.21 ± 1.47        | 88.21 ± 2.23        | <b>81.5 ± 1.47</b>        | <b>80.83 ± 2.7</b> | <b>80.28 ± 1.4</b> | <b>85.76 ± 1.5</b>         | <b>85.4 ± 2.02</b>  | <b>85.76 ± 2.23</b> | <b>73.34 ± 5.89</b>     | <b>71.21 ± 5.53</b> | <b>73.68 ± 4.87</b> |

Table S3 : ROCAUC scores on the *DBH* dataset in four settings, for a test sample positive:negative ratios in {1:1, 1:2, 1:5}

|                             | raw ( $S_1$ )       |                    |                     | orphan proteins ( $S_2$ ) |                     |                     | orphan molecules ( $S_3$ ) |                     |                    | double orphan ( $S_4$ ) |                     |                     |
|-----------------------------|---------------------|--------------------|---------------------|---------------------------|---------------------|---------------------|----------------------------|---------------------|--------------------|-------------------------|---------------------|---------------------|
|                             | 1:1                 | 1:2                | 1:5                 | 1:1                       | 1:2                 | 1:5                 | 1:1                        | 1:2                 | 1:5                | 1:1                     | 1:2                 | 1:5                 |
| SVM                         | 78.34 ± 0.44        | 66.85 ± 0.68       | 48.99 ± 0.5         | 50.35 ± 2.64              | 33.46 ± 2.33        | 16.82 ± 1.54        | 78.2 ± 1.77                | 66.86 ± 2.12        | 48.66 ± 2.74       | 49.84 ± 1.7             | 33.26 ± 1.64        | 16.81 ± 1.02        |
| <i>NRLMF</i>                | 86.14 ± 0.45        | 78.73 ± 0.75       | 66.93 ± 1.06        | 68.19 ± 1.55              | 53.68 ± 1.72        | 34.75 ± 1.65        | 61.88 ± 0.99               | 45.93 ± 0.72        | 26.42 ± 0.52       | 50.45 ± 1.31            | 33.71 ± 1.25        | 16.99 ± 0.8         |
| FNN                         | <b>91.45 ± 0.45</b> | <b>86.5 ± 0.44</b> | <b>75.91 ± 0.49</b> | 78.16 ± 0.44              | 66.02 ± 1.86        | 49.13 ± 2.58        | <b>85.69 ± 1.05</b>        | <b>78.15 ± 1.18</b> | <b>64.06 ± 1.6</b> | <b>71.46 ± 2.02</b>     | <b>57.93 ± 2.7</b>  | <b>38.61 ± 2.29</b> |
| chemogenomic neuron network | 88.74 ± 1.68        | 80.29 ± 2.65       | 65.46 ± 4.53        | <b>81.82 ± 1.9</b>        | <b>70.39 ± 3.66</b> | <b>47.68 ± 4.38</b> | <b>86.0 ± 1.85</b>         | <b>77.02 ± 3.41</b> | 62.22 ± 4.66       | <b>72.26 ± 6.42</b>     | <b>55.98 ± 7.67</b> | <b>38.48 ± 7.5</b>  |

Table S4 : AUPR scores on the *DBH* dataset in four settings, for a test sample positive:negative ratios in {1:1, 1:2, 1:5}
